# Supplementary material for: Synthesis, molecular characterization and self-assembly of (PS-b-PDMS)n type linear (n = 1, 2) and star (n = 3, 4) block copolymers
Source: Royal Society of Chemistry journal article supplement (doi:10.1039/c6py01768a), 2016-11-23
Supplement: c6py01768a1.pdf [file c6py01768a1.pdf]

## Electronic Supplementary Information

# Synthesis, Molecular Characterization and Self-Assembly of (PS-*b*-PDMS)<sub>n</sub> Type Linear (n = 1,2) and Star (n = 3,4) Block Copolymers

Prokopios Georgopoulos<sup>a,b,c</sup>, Ting-Ya Lo<sup>c</sup>, Rong-Ming Ho<sup>c\*</sup> and Apostolos Avgeropoulos<sup>a\*</sup>

a. Department of Materials Science Engineering, University of Ioannina, University Campus - Dourouti, Ioannina 45110, Greece.

b. Institute of Polymer Research, Helmholtz-Zentrum Geesthacht, Max-Planck-Str. 1, Geesthacht 21502, Germany.

c. Department of Chemical Engineering, National Tsing Hua University, Hsinchu 30013, Taiwan, R.O.C.

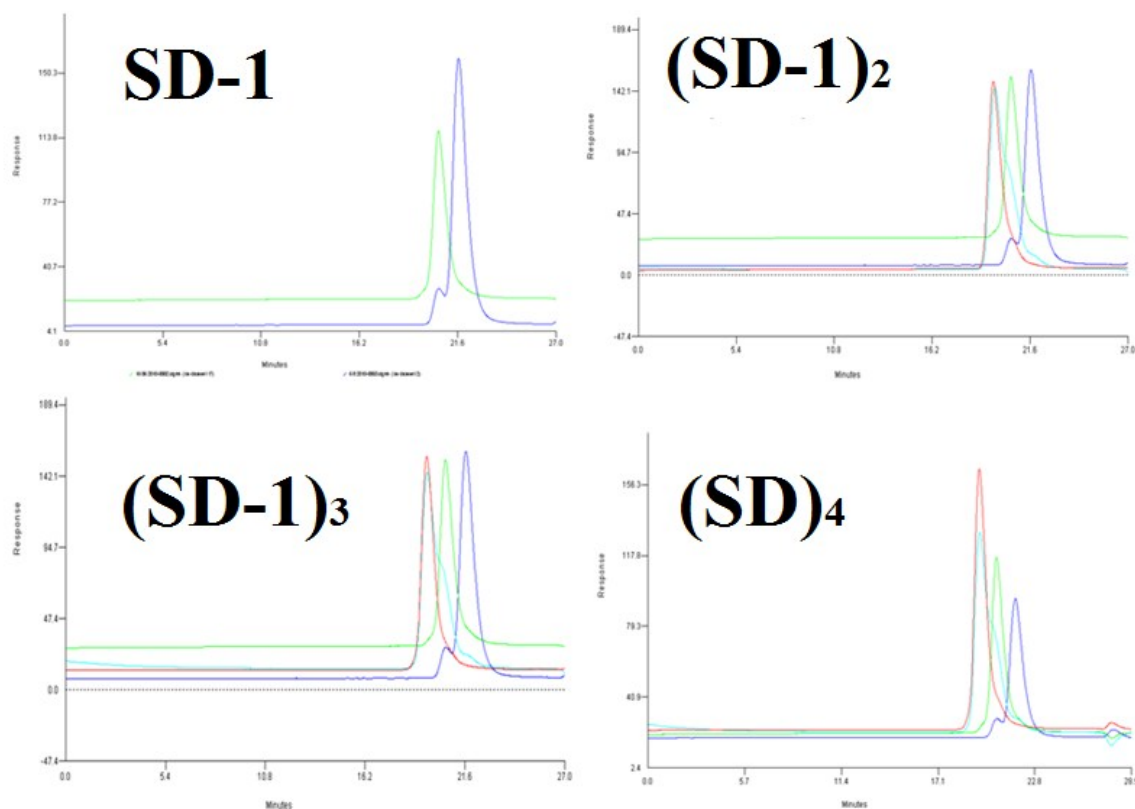

**Figure S1a.** Chromatographs of diblock copolymer SD-1, triblock copolymer (SD-1)<sub>2</sub>, 3-arm star block copolymer (SD-1)<sub>3</sub> and 4-arm star block copolymer (SD)<sub>4</sub>. Different color will correspond to different product during the synthesis process: PS precursor (blue), the diblock (SD-1) (green), the un-fractionated star-block copolymer (cyan) and the fractionated star-block copolymer (red).

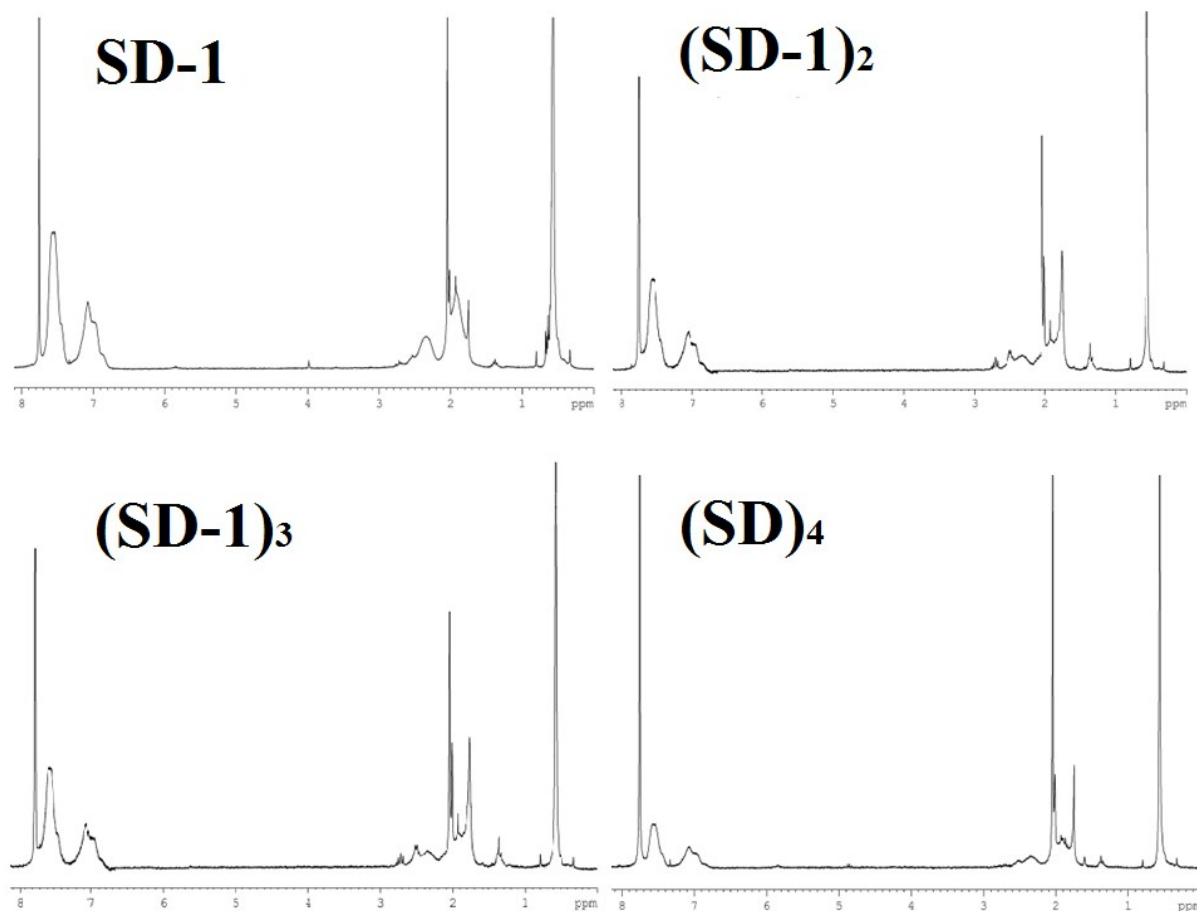

**Figure S1b.** <sup>1</sup>H-NMR spectra of the diblock copolymer SD-1, triblock copolymer (SD-1)<sub>2</sub>, 3-arm star block copolymer (SD-1)<sub>3</sub> and 4-arm star block copolymer (SD)<sub>4</sub>.

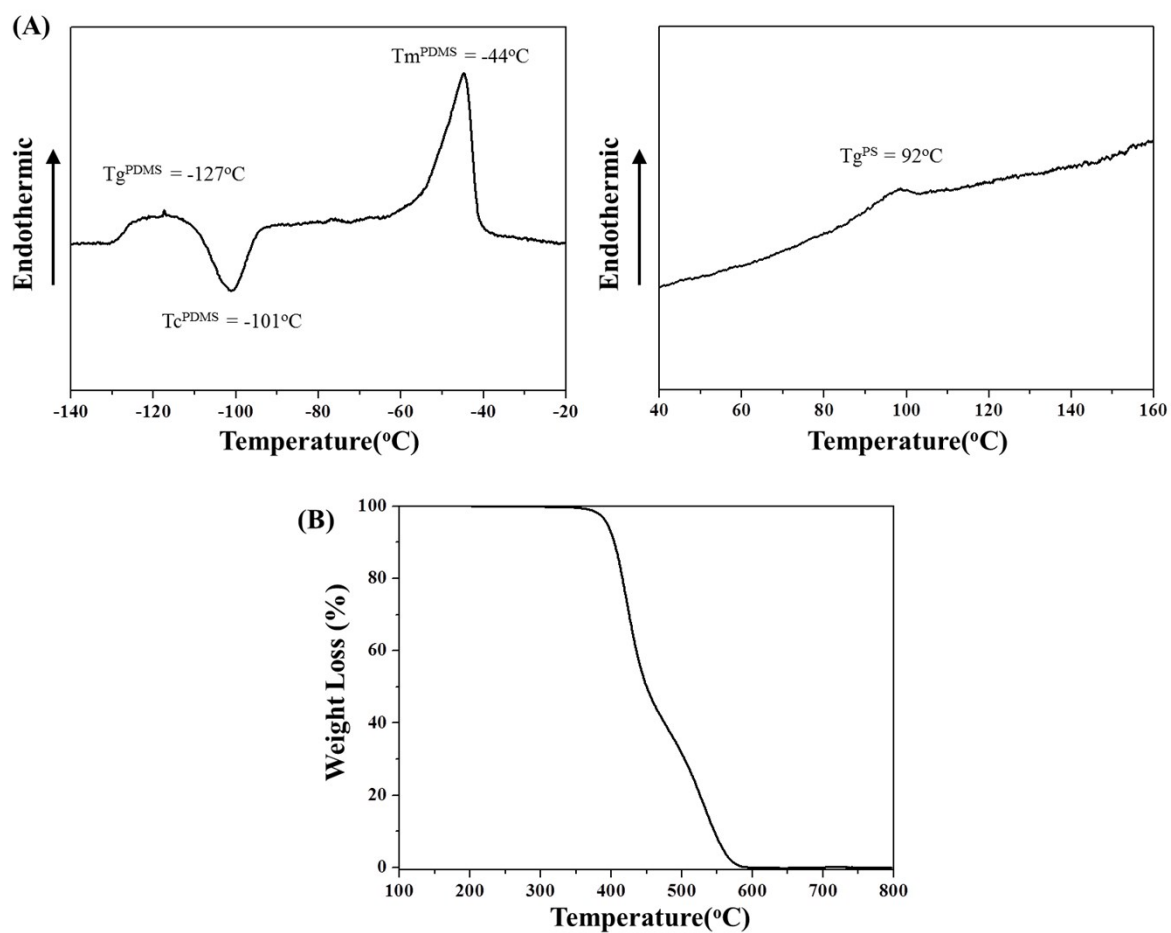

**Figure S2.** (A) DSC and (B) TGA thermographs of  $(\text{SD-1})_3$  three arm star-block copolymer.

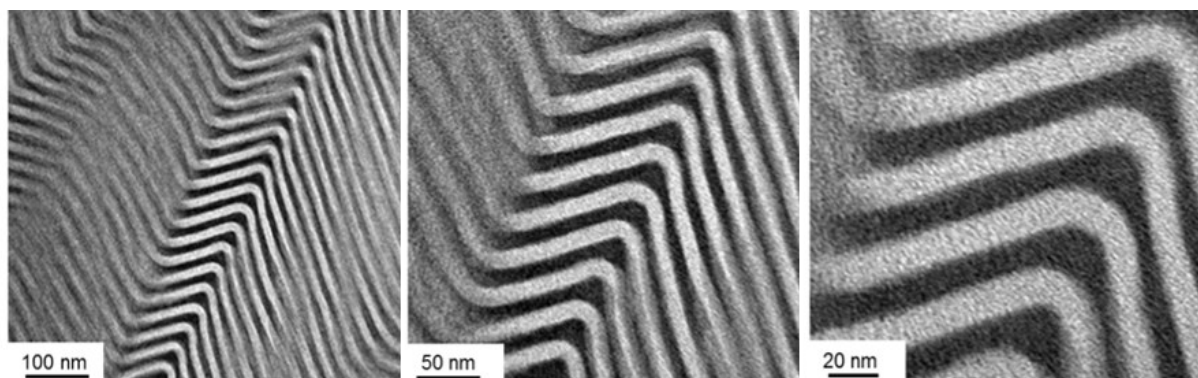

**Figure S3.** TEM images of sample (SD-1)<sub>3</sub> at different magnifications.

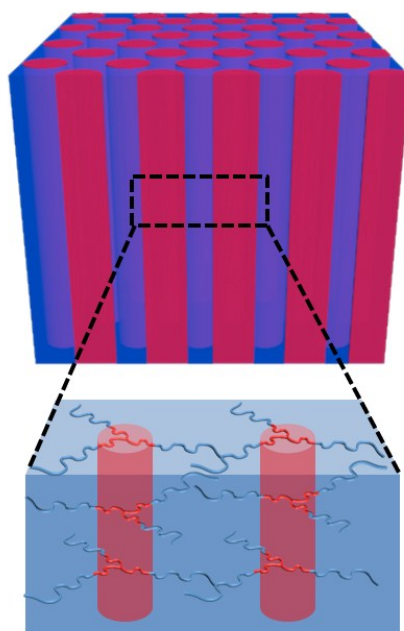

**Figure S4.** Schematic illustration of the packing of the polymer chain for cylinder forming three-arm star-block copolymer.
